# Supplementary material for: Spatial-temporal dynamics of hunter effort for wild turkeys in Michigan
Source: PLOS journal article supplement (doi:10.1371/journal.pone.0230747), 2020-04-01

**Figure S1. Estimated total turkey hunter population size (A), raw harvest (B), and harvest-per-unit effort (C) during spring hunting seasons in southern Michigan, USA (2001-2014).**

A)

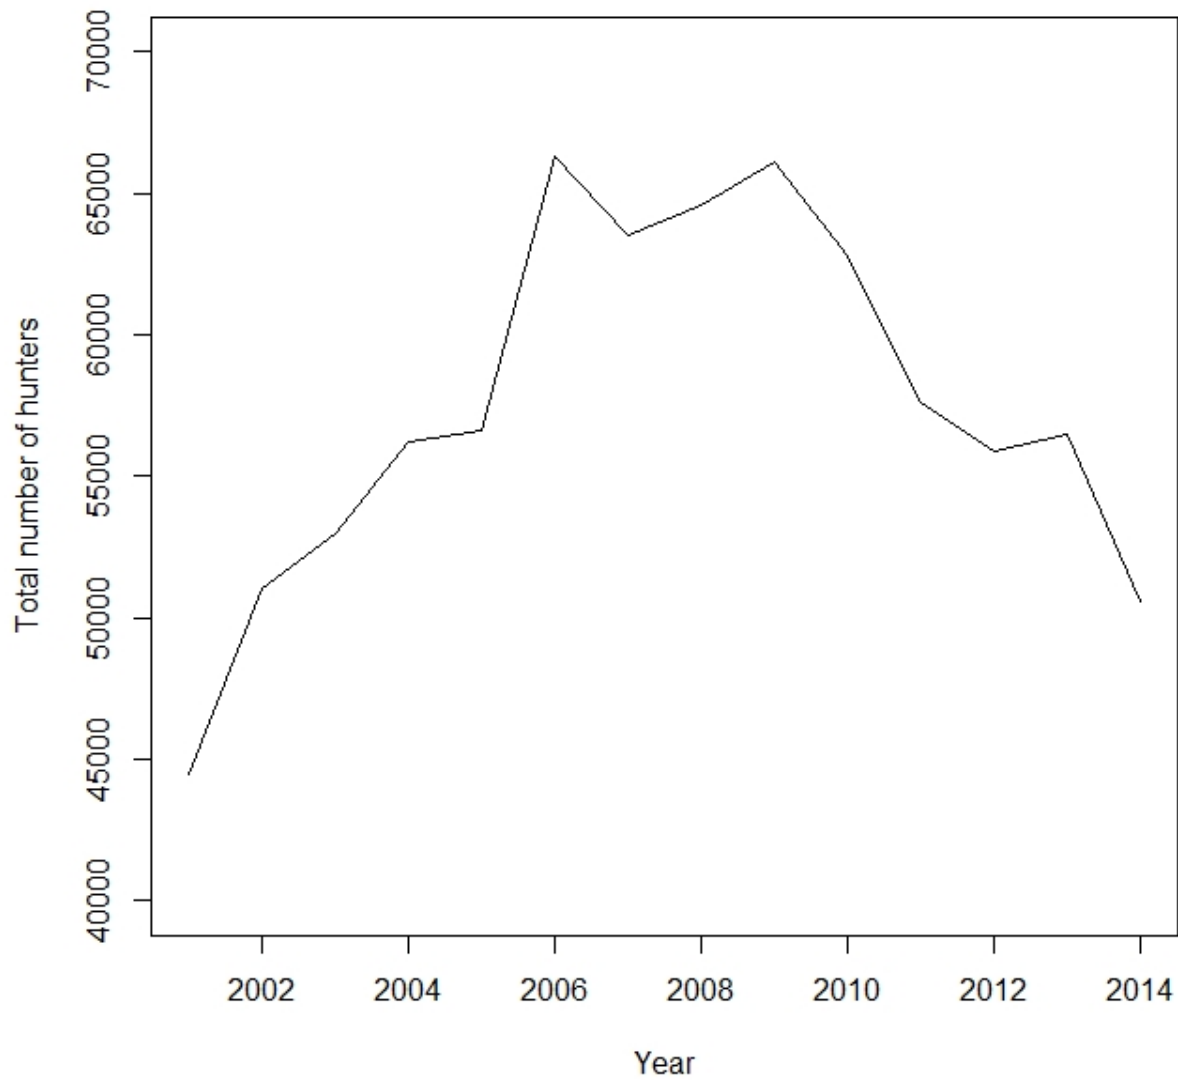

B)

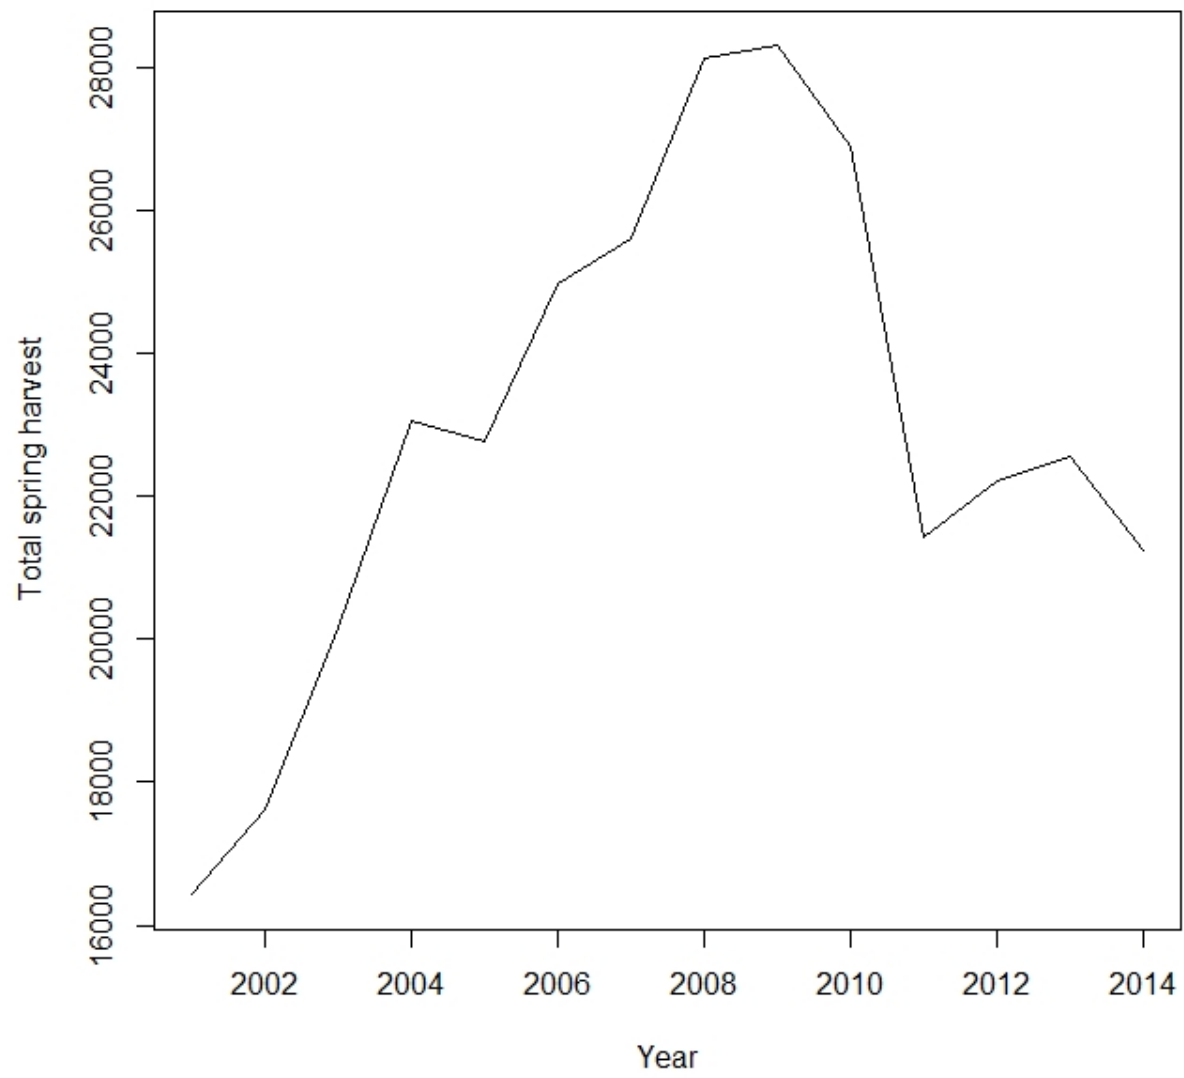

C)

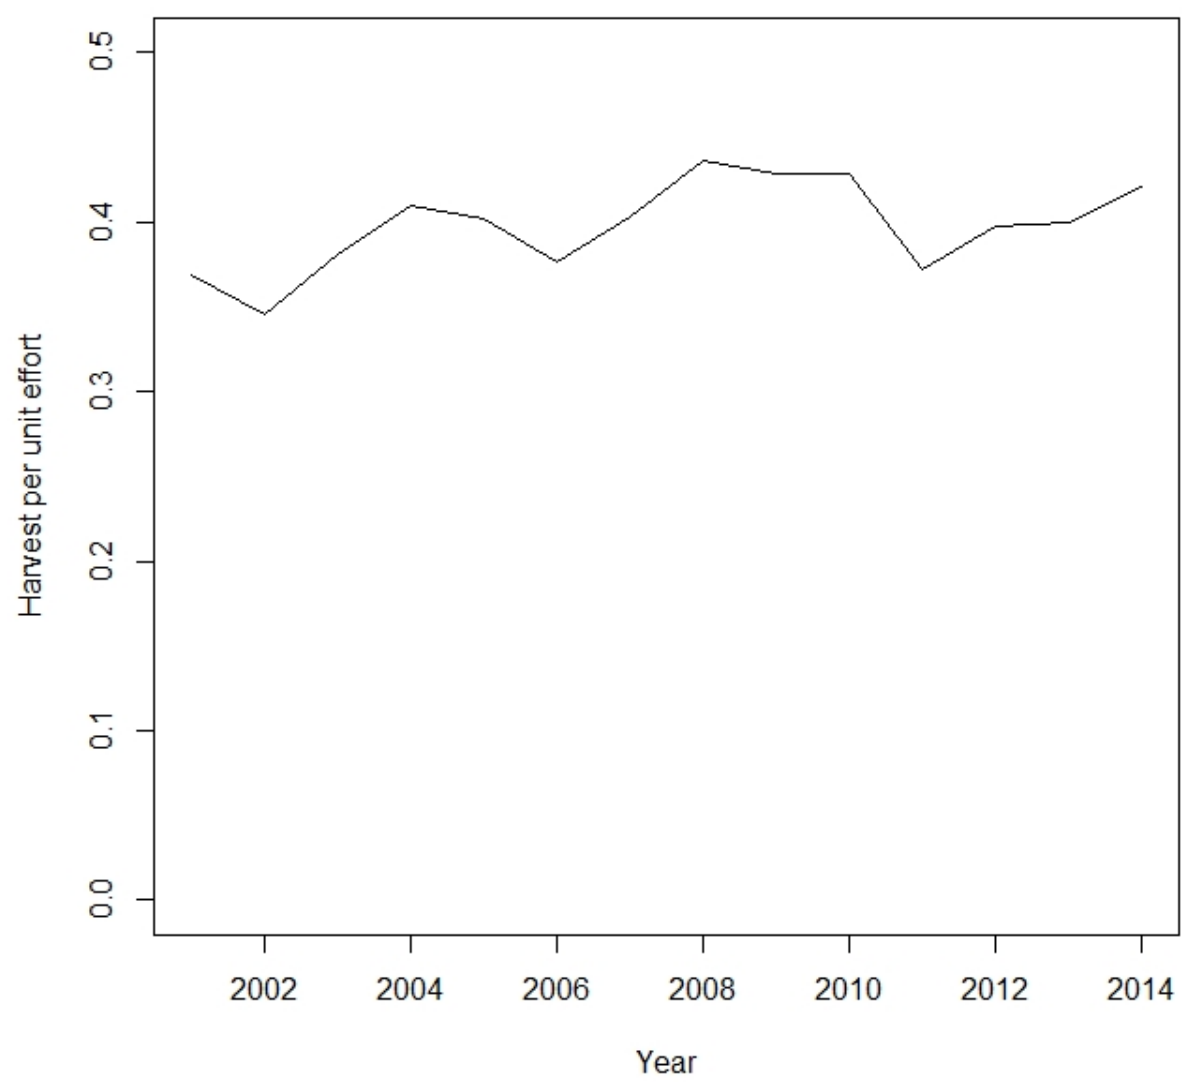

Supplement: S2 (10.1371/journal.pone.0230747.s002) [file journal.pone.0230747.s002]
